# Supplementary material for: Comparative Molecular and Epidemiological Analyses of Israeli Bluetongue Viruses Serotype 1 and 9 Causing Outbreaks in 2018–2020
Source: MDPI journal article supplement (doi:10.3390/microorganisms11020366), 2023-02-01
Supplement: s1 [file s1]

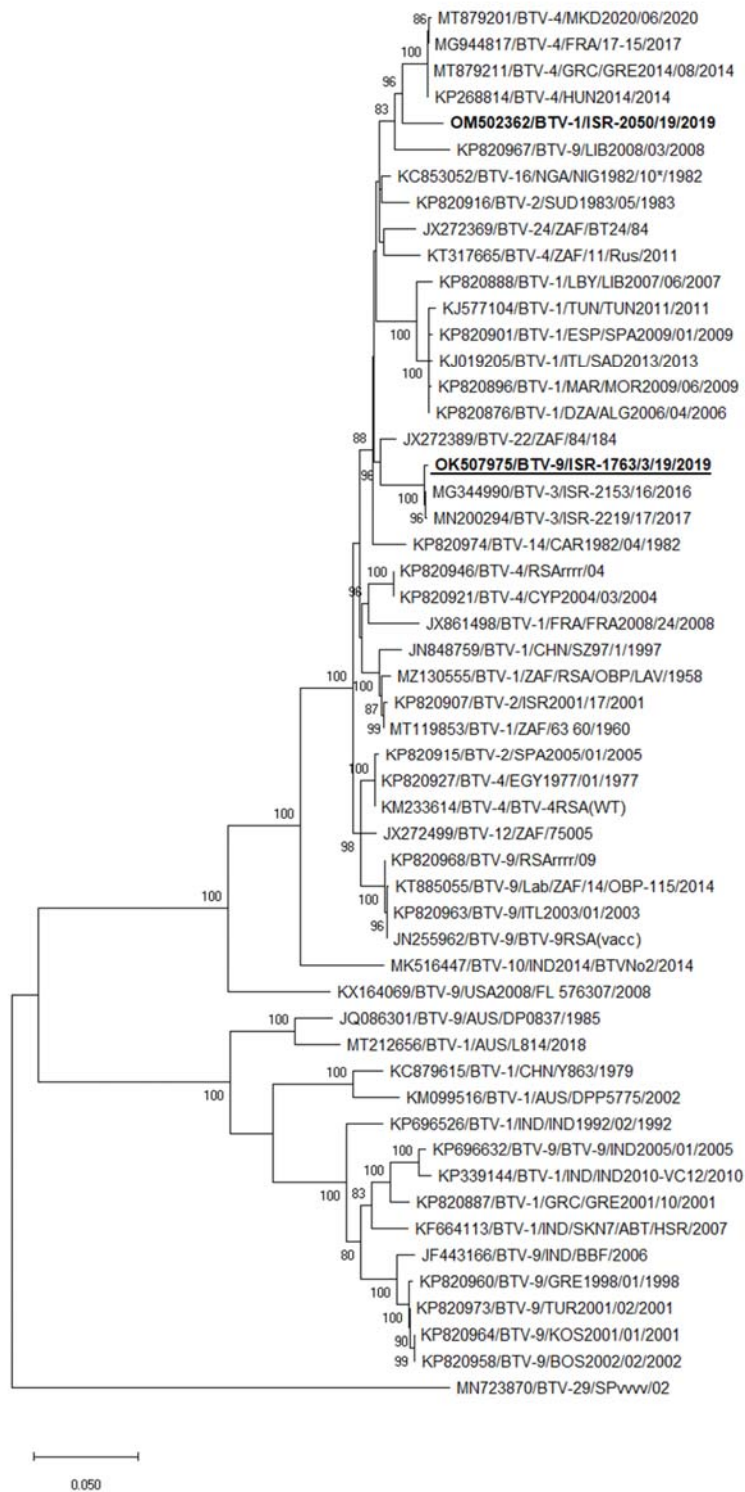

(a)

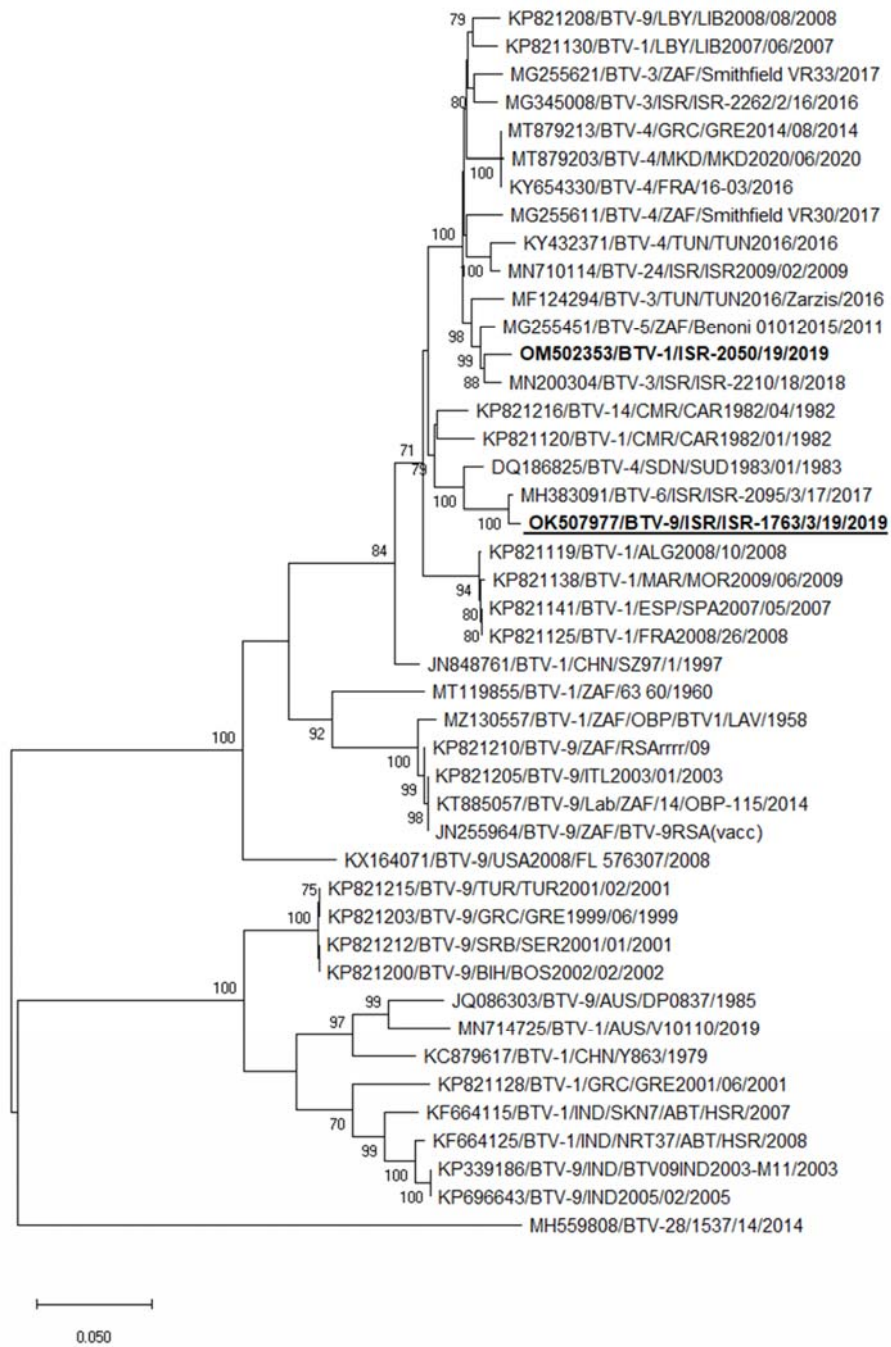

(b)

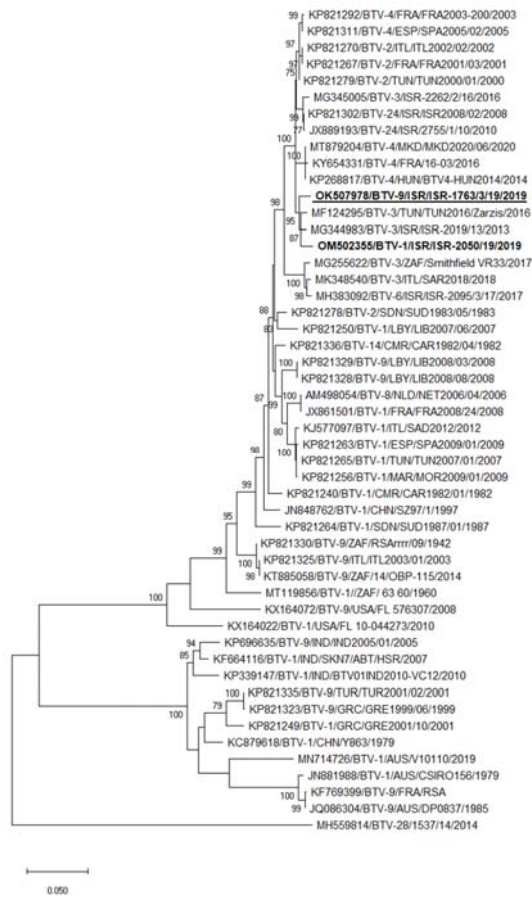

(c)

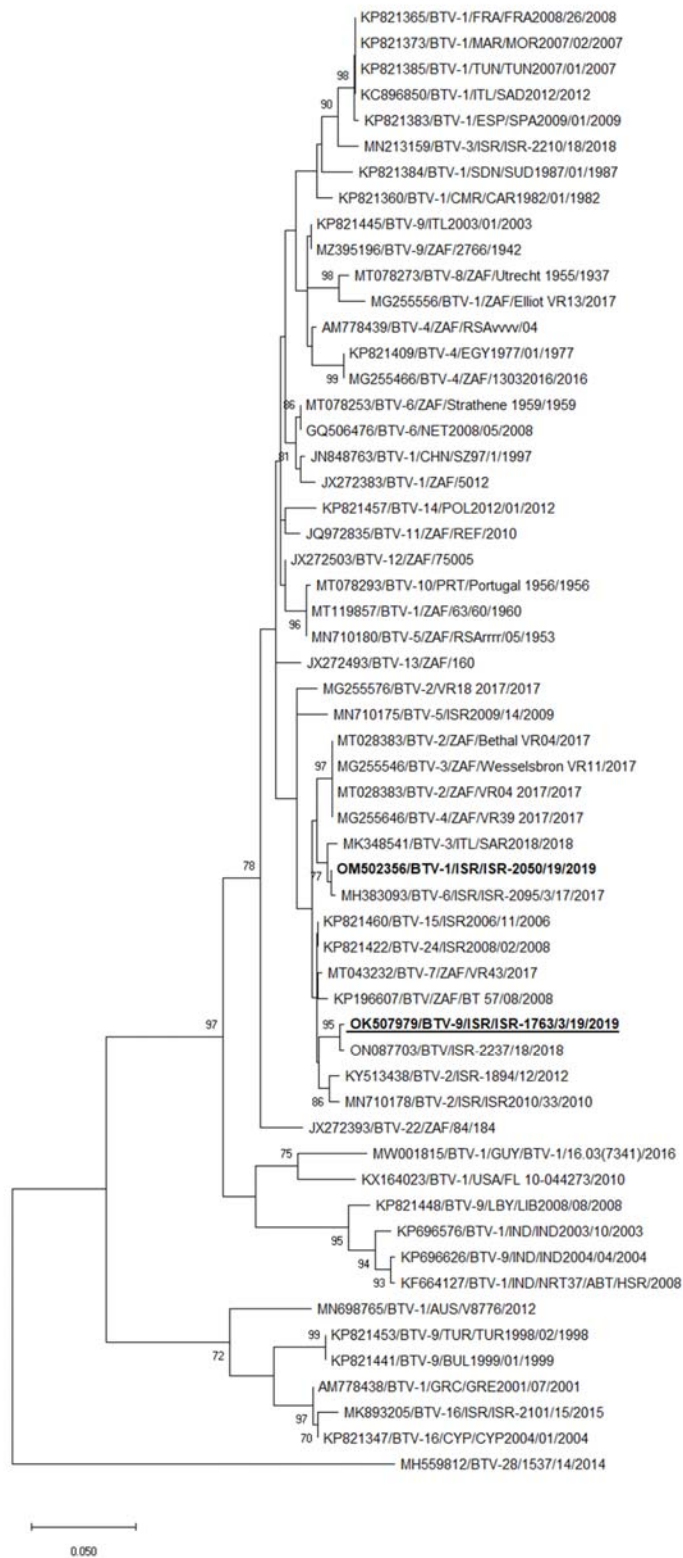

(d)

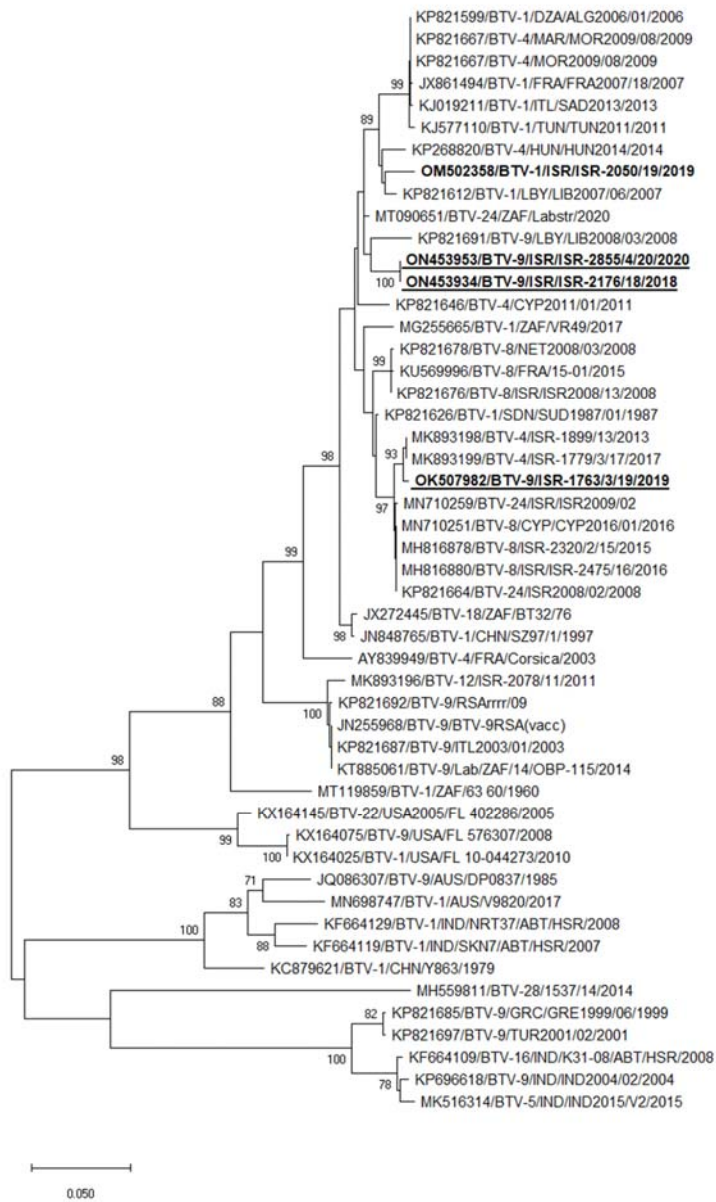

(e)



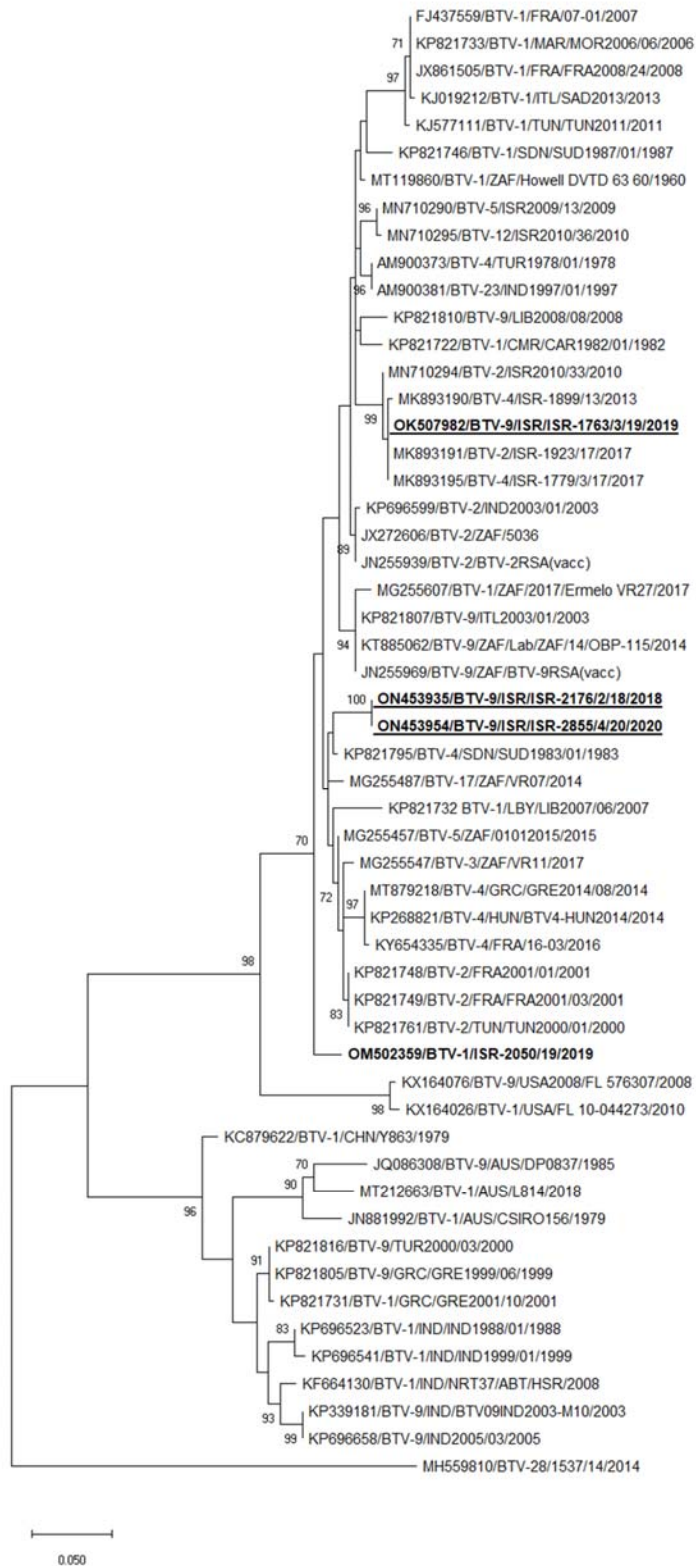

(f)

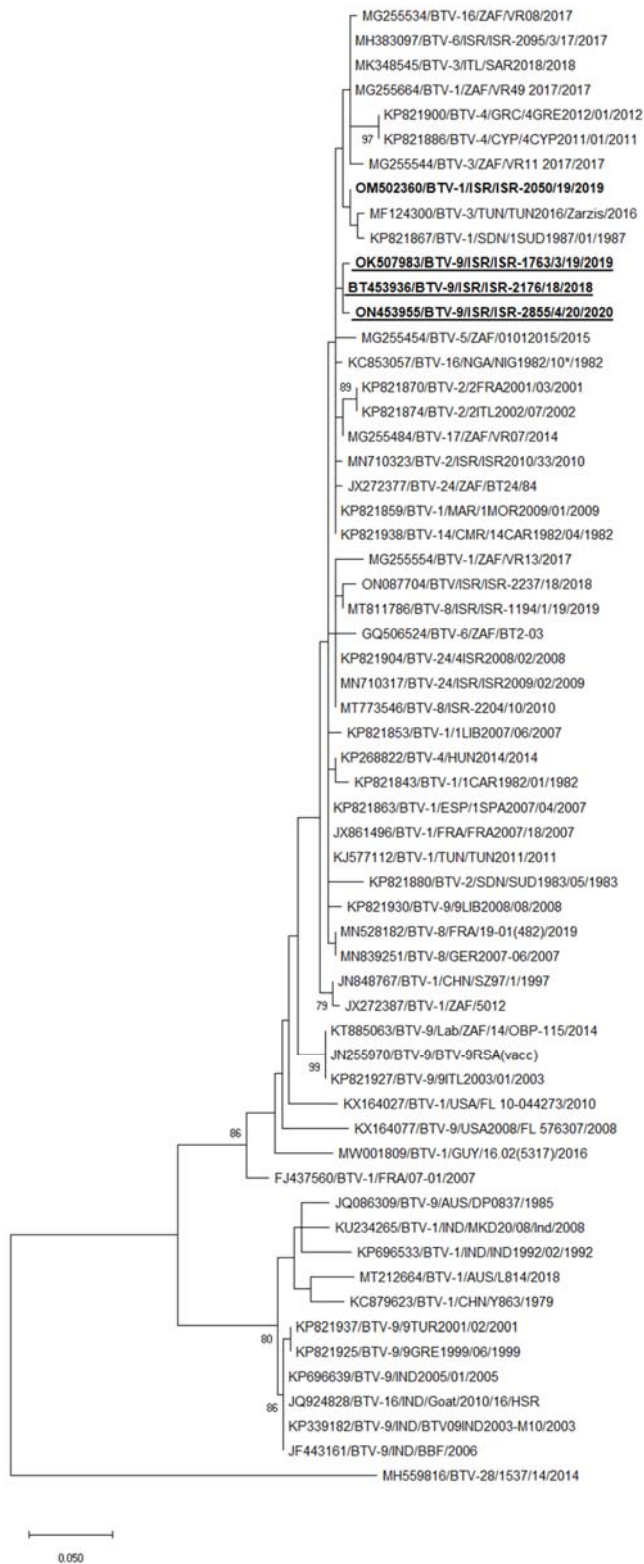

(g)

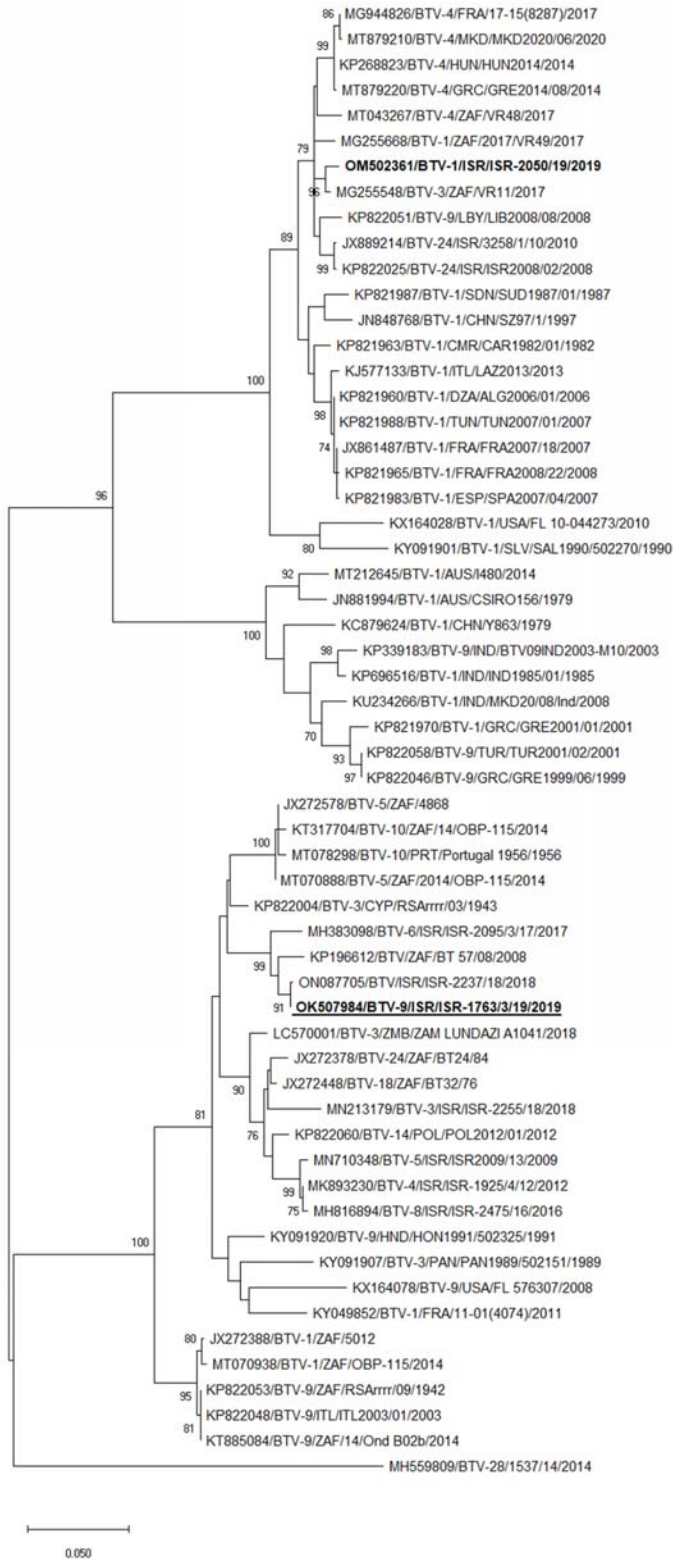

(h)



**Figure S1.** Phylogenetic trees of Israeli BTV-1 and BTV-9 strains isolated in 2018-2020 and global strains. a) segment 1; b) segment 3; c) segment 4; d) segment 5; e) segment 7; f) segment 8; g) segment 9; e) segment 10. Israeli BTV-1 strain is shown in bold. Israeli BTV-9 strain is shown in bold and is underlined. The phylogeny was inferred using the Maximum Likelihood method and Tamura-Nei model method. The percentage of replicate trees in which the associated taxa clustered together in the bootstrap test (1000 replicates) are shown next to the branches. Viruses were identified by accession number/serotype/location/isolate/year.

**Table S1. List of primers used for partial sequencing of Israeli bluetongue virus serotype 9**

| segment | name          | sequence                           | length of product | source     |
|---------|---------------|------------------------------------|-------------------|------------|
| 1       | UNI-VP1-1-F   | GTAAAAATGCAATGGTCGCAAT             |                   | this study |
|         | VP1-414R      | TAT ATT TGC ATC TCG TTT TTA GC     | 436               | this study |
|         | UNI-VP1-810-R | CCCCACATCTTYACAAACCA               | 829               | this study |
|         | VP1-Uni-2212F | ATA ACA TGG CTA TTG GGA CC         |                   | this study |
|         | VP1-Uni-2684R | TCA AAC TTT CTG TCG CGA TAC        | 493               | this study |
| 2       | 9VP2-1F       | GTT AAA AAC GCT GTC CCG AGA        |                   | this study |
|         | 9VP2-422R     | TTC GCA ACM CCA TTC ATA AA         | 444               | this study |
|         | 9VP2-950R     | TCC GAG AAG AAC ATG GTA TCA        | 970               | this study |
|         | 9VP2-150F     | AAA GAG CGT AAA GCA ATT GA         |                   | this study |
|         | 9VP2-507R     | CAC ATC TTG TAC CCT GGA ATG        | 377               | this study |
| 3       | VP3-Isr-F     | GGAGATGTRCTKTCGAGTGATTC            |                   | this study |
|         | VP3-Isr-R     | CATTAAGYTGTGTGCGGTTGG              | 958               | this study |
|         | BT-S3-F       | GTAAATTTCCGTRGCRYATGGC             |                   | Sun 2014   |
|         | VP3-337R      | CCT GCG ACA TCT CTT CAT AGT        | 352               | this study |
| 4       | BT-S4-F       | GTAAAAACATGCCTGAGCCA               |                   | this study |
|         | VP4-281R      | ATC TTG ACT TTT TGC GAC TTC C      | 303               | this study |
|         | VP4-516R      | TCA GTH GGC TCA TCG TCA AA         | 536               | this study |
| 5       | NS1-1191F     | TAG TTC GCG ATG AAC AAA TTG G      |                   | this study |
|         | uni-NS1-1747R | AAG TTG AAA AGT TCT AGT AGA GTG CT | 579               | this study |
|         | UNI-NS1-40F   | GCGCTTTTTGAGAAAATACAAC             |                   | this study |
|         | UNI-NS1-428R  | AGAGAATCATCCAATCTAACTCT            | 411               | this study |
| 6       | 9VP5-1F       | GTT AAA AAG CGT ACC CTT AGC        |                   | this study |
|         | 9VP5-818R     | TCA AAT CAA TTC CGC TCA G          | 836               | this study |
|         | 9VP5-442R     | TTC GCA ACM CCA TTC ATA AA         | 431               | this study |
| 7       | VP7-Isr-F     | TTTATGTGTTTAGATATGATGCTGT          | 874               | this study |
|         | 3VP7-1f-deg   | GTAAAAAATHCTAGAGATGGACACT          | 694               | this study |
|         | VP7-Isr-R     | TATTCGGCAGTGTAGTTCTGTTTAG          |                   | this study |

|    |               |                                |      |              |
|----|---------------|--------------------------------|------|--------------|
| 8  | BT-S8-F       | GTAAAAAAWCCTTGAGTCATG          |      | Sun 2014     |
|    | NS2-331R      | TCA ACC ATC ACD CCA TTA TGT T  | 353  | this study   |
|    | 3NS2-350R     | GCA TCA ACC ATC ACA CCA TT     | 370  | this study   |
|    | UNI-NS2-17F   | ATGGAGCAAAAGCAACG              |      | this study   |
|    | UNI-NS2-1026R | AGAGACAAAAGCAACACGCT           | 1026 | this study   |
| 9  | BT-S9-F       | GTAAAAAAATCGCATATGTCTRG        |      | Sun 2014     |
|    | VP6-448R      | TCA ACT TTC GTA CCG TAT TTA GA | 471  | this study   |
| 10 | BTV-NS3-183F  | AAATMTTGGAYAAAGCRATGTCAAA      |      | Wernike 2015 |
|    | NS3-802r-deg  | TAA GTG TGT AGY GYC GCG YA     | 639  | this study   |
|    | BT-EHD-S10R   | ACCCTCCCCCGYTAKACARC           | 604  | this study   |

**Table S2.** List of sequenced Israeli BTV strains used for the present study

| host/date of<br>sampling/source | segment/<br>length<br>serotype<br>/strain | 1/3944             | 2/2926-2939         | 3/2772                | 4/1981             | 5/1774-1776           | 6/1637-1645         | 7/1156              | 8/1125-1131         | 9/1047-1050         | 10/822              |
|---------------------------------|-------------------------------------------|--------------------|---------------------|-----------------------|--------------------|-----------------------|---------------------|---------------------|---------------------|---------------------|---------------------|
| sheep/2018/<br>whole blood      | 9/ISR-<br>2077/3/18                       | ON453918<br>12-436 | ON453919<br>1-574   | ON453920<br>18-357    | ON453921<br>1-535  | ON453922<br>52-435    | ON453923<br>46-790  | ON453924<br>14-526  | ON453925<br>11-354  | ON453926<br>1-470   | ON453927<br>120-783 |
| cattle/2018/<br>whole blood     | 9/ISR-<br>2176/2/18                       | ON453928<br>12-436 | ON453929<br>153-518 | ON453930<br>18-357    | ON453931<br>24-286 | ON453932<br>1231-1712 | ON453933<br>2-441   | ON453934<br>214-888 | ON453935<br>1-354   | ON453936<br>22-465  | ON453937<br>1-282   |
| sheep/2019/<br>VI (Vero cells)  | 9/ISR-<br>1763/3/19                       | OK507975<br>1-3930 | OK507976<br>10-2893 | OK507977<br>4-2768    | OK507978<br>8-1968 | OK507979<br>1-1754    | OK507980<br>13-1625 | OK507981<br>13-1114 | OK507982<br>1-1112  | OK507983<br>1-1036  | OK507984<br>14-794  |
| sheep/2019/<br>VI (ECE)         | 9/ISR-1872/19                             | -                  | -                   | -                     | -                  | -                     | -                   | ON453957<br>14-881  | ON453958<br>14-1031 | ON453959<br>3-1018  | -                   |
| sheep/2019/<br>VI (ECE)         | 9/ISR-1915/19                             | -                  | -                   | -                     | -                  | -                     | -                   | ON453960<br>15-884  | ON453961<br>11-1017 | ON453963<br>5-1008  | -                   |
| cattle/2019/<br>VI (ECE)        | 9/ISR-<br>2020/2/19                       | ON453908<br>1-817  | ON453909<br>153-949 | ON453910<br>91-1015   | ON453911<br>1-535  | ON453912<br>49-435    | ON453913<br>1-829   | ON453914<br>1-874   | ON453915<br>11-1017 | ON453916<br>1-471   | ON453917<br>200-802 |
| sheep/2019/<br>VI (ECE)         | 9/ISR-<br>2077/4/19                       | -                  | -                   | -                     | -                  | -                     | -                   | ON453963<br>16-885  | ON453964<br>42-998  | ON453965<br>49-1012 | -                   |
| sheep/2020/<br>whole blood      | 9/ISR-<br>2758/1/20                       | ON453938<br>1-436  | ON453939<br>153-528 | ON453940<br>2196-2758 | ON453941<br>1-257  | ON453942<br>1235-1713 | ON494587<br>1-441   | ON453943<br>246-884 | ON453944<br>11-354  | ON453945<br>1-470   | ON453946<br>200-783 |
| cattle/2020/                    | 9/ISR-<br>2855/4/20                       | ON453947           | ON453948            | ON453949              | ON453950           | ON453951              | ON453952            | ON453953            | ON453954            | ON453955            | ON453956            |

|                 |               |         |          |         |         |          |          |         |          |          |         |
|-----------------|---------------|---------|----------|---------|---------|----------|----------|---------|----------|----------|---------|
| whole blood     |               | 1-817   | 17-949   | 18-1015 | 1-535   | 52-435   | 1-441    | 203-884 | 11-354   | 1-470    | 200-783 |
|                 |               | OM50236 |          | OM50235 | OM50235 |          |          | OM50235 |          |          | OM50236 |
| cattle/2019     | 1/ISR-2050/19 | 2       | OM502353 | 4       | 5       | OM502356 | OM502357 | 8       | OM502359 | OM502360 | 1       |
| VI (Vero cells) |               | 15-3933 | 5-2768   | 5-2768  | 1-1969  | 1-1771   | 11-1631  | 1-1143  | 17-1113  | 1-1044   | 1-822   |

Upper rows provide accession numbers of sequenced regions. Lower rows show sequences regions. Source- source or sequencing. VI- virus isolation. ECE- embryonated chicken embryos. Strains ISR-2050/19 and ISR-1763/3/19 were sequenced by NGS technology; the last of the strains were sequenced by Sanger sequencing technology.
